# Supplementary material
Source: PubMed Central journal article supplement (PMC3632655)
Supplement: NIHMS425173-supplement-01.pdf [file NIHMS425173-supplement-01.pdf]

**Supplemental Table 1: Number of fibroids by race and selected variables.**

|                                                                                     | African-American |                  |                | White    |                  |                            |
|-------------------------------------------------------------------------------------|------------------|------------------|----------------|----------|------------------|----------------------------|
|                                                                                     | <u>N</u>         | <u>Mean (SD)</u> | <u>p-value</u> | <u>N</u> | <u>Mean (SD)</u> | <u>p-value<sup>a</sup></u> |
| <b>Age categories</b>                                                               |                  |                  |                |          |                  |                            |
| 30 – 34                                                                             | 12               | 5.3 (6.8)        |                | 8        | 4.1 (4.0)        |                            |
| 35 – 39                                                                             | 54               | 7.9 (5.9)        | 0.4            | 25       | 4.0 (3.7)        | 0.9                        |
| 40 – 44                                                                             | 100              | 11.4 (9.2)       | 0.08           | 57       | 4.5 (3.5)        | 0.8                        |
| 45 - 47                                                                             | 42               | 10.1 (7.4)       | 0.2            | 31       | 5.1 (5.1)        | 0.6                        |
| <b>BMI categories</b>                                                               |                  |                  |                |          |                  |                            |
| <25                                                                                 | 23               | 9.1 (7.7)        |                | 44       | 4.8 (3.7)        |                            |
| 25 - <30                                                                            | 51               | 10.8 (9.3)       | 0.4            | 33       | 3.8 (3.4)        | 0.3                        |
| 30 - <35                                                                            | 54               | 10.8 (7.9)       | 0.4            | 23       | 4.8 (5.6)        | 1.0                        |
| ≥35                                                                                 | 78               | 8.9 (7.6)        | 0.9            | 19       | 4.7 (3.5)        | 1.0                        |
| <b>Time since fibroid diagnosis</b>                                                 |                  |                  |                |          |                  |                            |
| <1 year                                                                             | 57               | 8.8 (8.6)        |                | 46       | 3.3 (3.0)        |                            |
| 1-<5years                                                                           | 59               | 9.3 (5.9)        | 0.8            | 46       | 4.9 (4.5)        | 0.05                       |
| ≥5 years                                                                            | 90               | 10.9 (8.9)       | 0.1            | 28       | 5.9 (4.2)        | 0.006                      |
| <b>History of fibroids in mother or sister</b>                                      |                  |                  |                |          |                  |                            |
| Yes                                                                                 | 130              | 10.4 (7.6)       | 0.2            | 39       | 4.7 (3.6)        | 0.5                        |
| No                                                                                  | 62               | 8.7 (7.7)        |                | 68       | 4.1 (3.6)        |                            |
| <b>Total pregnancies</b>                                                            |                  |                  |                |          |                  |                            |
| None                                                                                | 23               | 12.4 (8.7)       |                | 17       | 7.8 (5.4)        |                            |
| 1 – 2                                                                               | 72               | 11.0 (8.2)       | 0.5            | 52       | 4.8 (4.0)        | 0.002                      |
| ≥3                                                                                  | 113              | 8.7 (7.7)        | 0.03           | 52       | 3.1 (2.8)        | <0.0001                    |
| <b>Time since last full-term pregnancy (among women with full-term pregnancies)</b> |                  |                  |                |          |                  |                            |
| 0-3 years                                                                           | 8                | 7.5 (7.8)        |                | 10       | 2.1 (1.4)        |                            |
| 4-9 years                                                                           | 35               | 8.1 (6.5)        | 0.8            | 24       | 2.6 (2.4)        | 0.7                        |
| 10+ years                                                                           | 128              | 10.0 (8.2)       | 0.4            | 60       | 4.1 (3.5)        | 0.2                        |
| <b>Duration of OC use</b>                                                           |                  |                  |                |          |                  |                            |
| Never                                                                               | 16               | 9.2 (5.6)        |                | 13       | 4.0 (3.1)        |                            |
| <1 year                                                                             | 18               | 8.9 (11.1)       | 0.9            | 20       | 3.6 (3.0)        | 0.7                        |
| 1-< 5 years                                                                         | 60               | 8.3 (6.6)        | 0.7            | 29       | 5.1 (3.8)        | 0.4                        |
| 5-<10 years                                                                         | 36               | 9.7 (8.5)        | 0.8            | 21       | 3.6 (3.1)        | 0.7                        |
| ≥ 10 years                                                                          | 76               | 11.5 (8.4)       | 0.3            | 35       | 4.8 (4.1)        | 0.5                        |
| <b>Smoking status</b>                                                               |                  |                  |                |          |                  |                            |
| Never                                                                               | 129              | 10.8 (8.5)       |                | 67       | 4.8 (4.4)        |                            |
| Former                                                                              | 30               | 7.7 (5.8)        | 0.1            | 31       | 4.0 (3.1)        | 0.4                        |
| Current                                                                             | 49               | 8.9 (8.1)        | 0.2            | 23       | 4.4 (4.0)        | 0.7                        |
| <b>History of High blood pressure</b>                                               |                  |                  |                |          |                  |                            |
| Yes                                                                                 | 88               | 9.3 (7.9)        |                | 23       | 5.1 (3.8)        |                            |
| No                                                                                  | 119              | 10.4 (8.3)       | 0.4            | 98       | 4.3 (4.1)        | 0.4                        |

\* p-values from student's t-test or analysis of variance.
